# Supplementary material
Source: PubMed Central journal article supplement (PMC3789335)
Supplement: CJN.01410213_CJN01410213SupplementaryData.pdf [file CJN.01410213_CJN01410213SupplementaryData.pdf]

Supplementary Table 1. Association pre-ESRD percentage weight change with mortality, stratified by pre-ESRD body mass index

| Percentage change in weight prior to dialysis initiation | Adjusted hazard ratio (95% CI) |                      |                      |                      |                      |
|----------------------------------------------------------|--------------------------------|----------------------|----------------------|----------------------|----------------------|
|                                                          | BMI <18.5                      | BMI 18.5 to <25      | BMI 25 to <30        | BMI 30 to <35        | BMI ≥35              |
| Quintile 1 (-59% to -15%)                                | 0.89<br>(0.43, 1.85)           | 1.43<br>(1.24, 1.67) | 1.39<br>(1.20, 1.61) | 1.44<br>(1.19, 1.74) | 1.17<br>(0.97, 1.42) |
| Quintile 2 (-1% to -9%)                                  | 0.79<br>(0.48, 1.31)           | 1.17<br>(1.01, 1.34) | 1.14<br>(0.98, 1.32) | 1.07<br>(0.88, 1.30) | 0.88<br>(0.71, 1.09) |
| Quintile 3 (-8% to -4%)                                  | 1.20<br>(0.78, 1.85)           | 1.02<br>(0.88, 1.17) | 1.14<br>(0.98, 1.33) | 1.10<br>(0.90, 1.34) | 1.04<br>(0.84, 1.27) |
| Quintile 4 (-3% to 3%)                                   | 1.00<br>(Ref)                  | 1.00<br>(Ref)        | 1.00<br>(Ref)        | 1.00<br>(Ref)        | 1.00<br>(Ref)        |
| Quintile 5 (4% to 58%)                                   | 0.91<br>(0.65, 1.27)           | 1.24<br>(1.09, 1.41) | 1.33<br>(1.14, 1.56) | 1.30<br>(1.05, 1.61) | 1.14<br>(0.91, 1.44) |

Abbreviations: ESRD – end-stage renal disease, HR - hazard ratio, CI - confidence interval

\* Adjusted for age, sex, race, diabetes, heart failure, ischemic heart disease, peripheral vascular disease, chronic lung disease, stroke, cancer, edema, and pre-ESRD hospitalizations.

Supplementary Table 2. Association of pre-ESRD percentage weight change with mortality, stratified by pre-ESRD height

| Percentage change in weight prior to dialysis initiation | Adjusted hazard ratio (95% CI) |                          |                          |                          |                          |
|----------------------------------------------------------|--------------------------------|--------------------------|--------------------------|--------------------------|--------------------------|
|                                                          | Q1<br>(91.4 – 154.9 cm)        | Q2<br>(155.0 – 160.0 cm) | Q3<br>(160.1 – 167.6 cm) | Q4<br>(167.7 – 175.3 cm) | Q5<br>(175.4 – 210.8 cm) |
| Quintile 1<br>(-59% to -15%)                             | 1.24<br>(1.01, 1.51)           | 1.35<br>(1.11, 1.64)     | 1.15<br>(0.99, 1.34)     | 1.61<br>(1.34, 1.93)     | 1.64<br>(1.34, 2.00)     |
| Quintile 2<br>(-1% to -9%)                               | 1.09<br>(0.90, 1.31)           | 1.07<br>(0.88, 1.30)     | 0.87<br>(0.74, 1.03)     | 1.37<br>(1.14, 1.64)     | 1.11<br>(0.90, 1.36)     |
| Quintile 3<br>(-8% to -4%)                               | 1.02<br>(0.84, 1.23)           | 1.17<br>(0.96, 1.41)     | 0.92<br>(0.78, 1.07)     | 1.26<br>(1.04, 1.52)     | 1.10<br>(0.90, 1.34)     |
| Quintile 4<br>(-3% to 3%)                                | 1.00<br>(Ref)                  | 1.00<br>(Ref)            | 1.00<br>(Ref)            | 1.00<br>(Ref)            | 1.00<br>(Ref)            |
| Quintile 5<br>(4% to 58%)                                | 1.24<br>(1.03, 1.50)           | 1.25<br>(1.04, 1.51)     | 1.13<br>(0.97, 1.32)     | 1.39<br>(1.16, 1.68)     | 1.23<br>(1.00, 1.51)     |

Abbreviations: ESRD – end-stage renal disease, HR - hazard ratio, CI - confidence interval

\* Adjusted for age, sex, race, diabetes, heart failure, ischemic heart disease, peripheral vascular disease, chronic lung disease, stroke, cancer, edema, pre-ESRD weight and pre-ESRD hospitalizations.
